# Supplementary material
Source: PubMed Central journal article supplement (PMC4339277)
Supplement: NIHMS590622-supplement-Supp_info_1.pdf [file NIHMS590622-supplement-Supp_info_1.pdf]

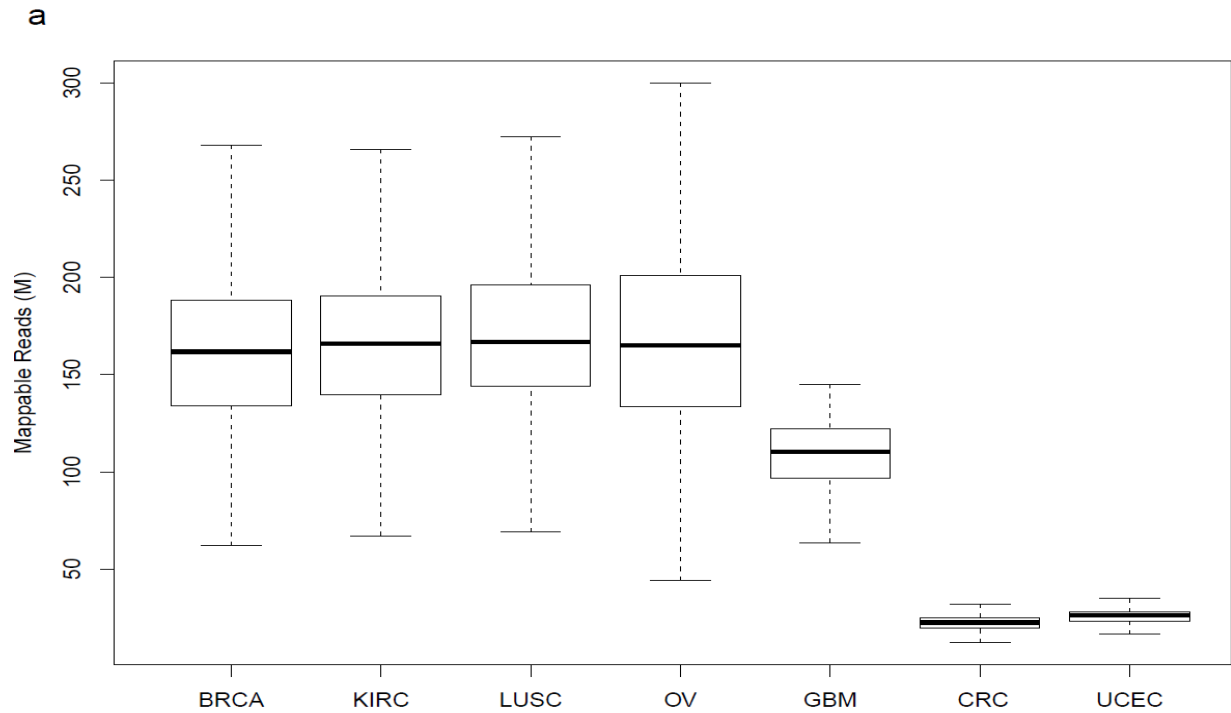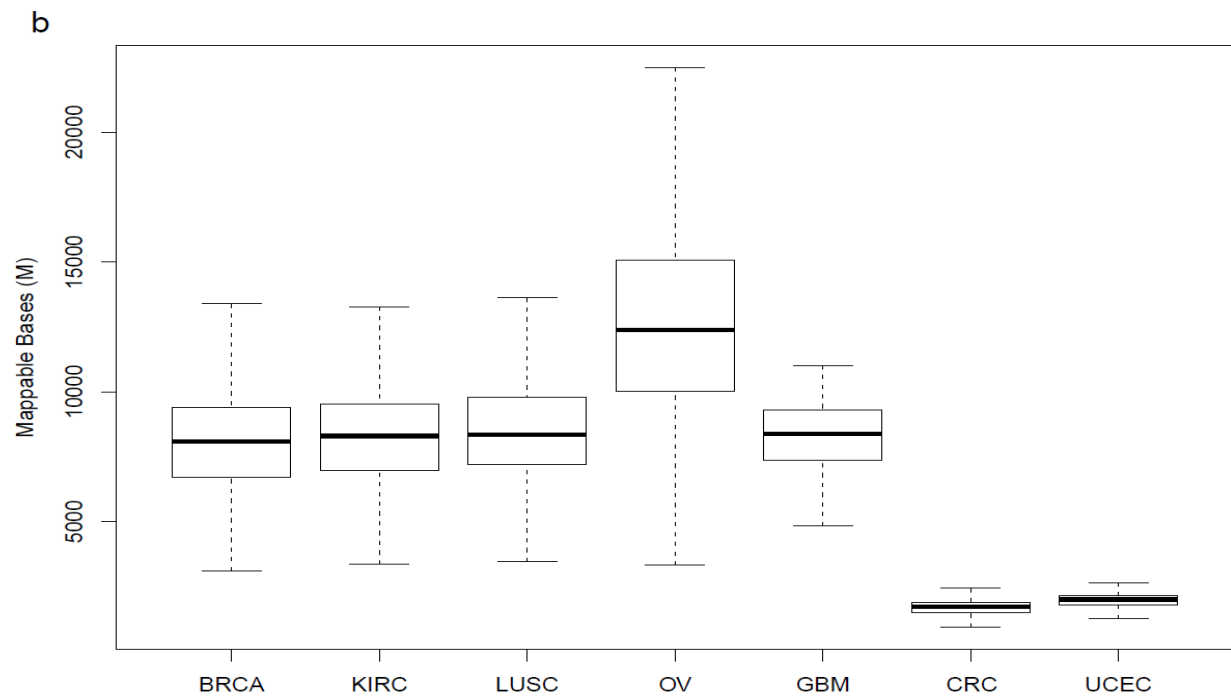

**Supplementary Figure 1. Distribution of mappable reads (million) and mappable (million) bases across different cancer types**

BRCA ( $n = 942$ ), KIRC ( $n = 515$ ), LUSC ( $n = 237$ ), OV ( $n = 412$ ), GBM ( $n = 154$ ), CRC ( $n = 228$ ), and UCEC ( $n = 320$ ). The boxes show the median  $\pm$  1 quartile, with whiskers extending to the most extreme data point within 1.5 interquartile range from the box boundaries.

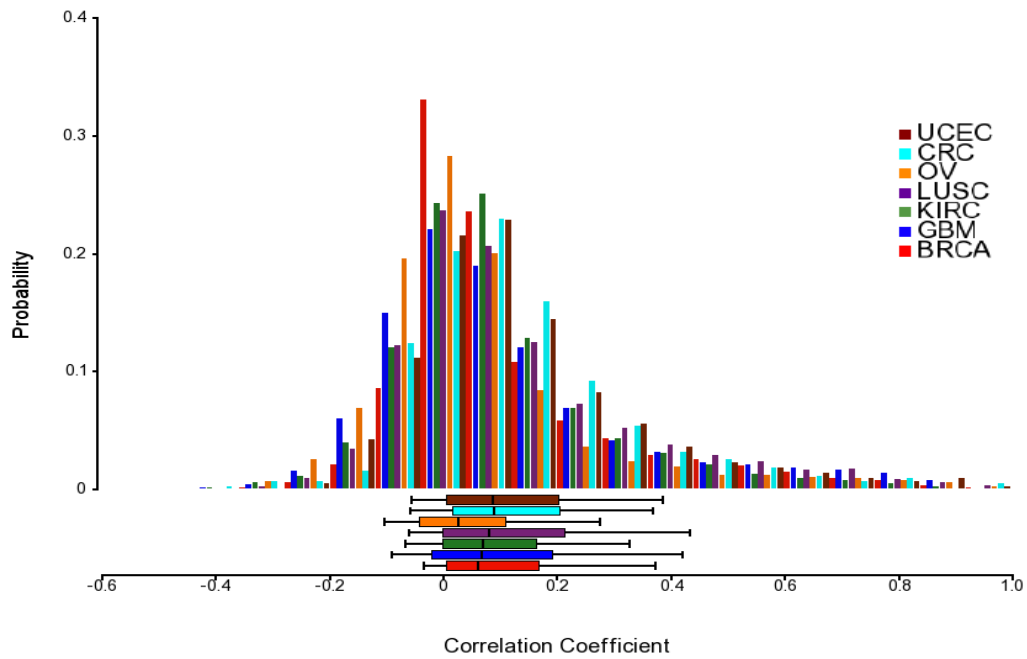

**Supplementary Figure 2. Correlations between pseudogenes and their WT cognate genes in different cancer types**

The boxes show the median  $\pm$  1 quartile, with whiskers extending to the most extreme data point within 1.5 interquartile range from the box boundaries.

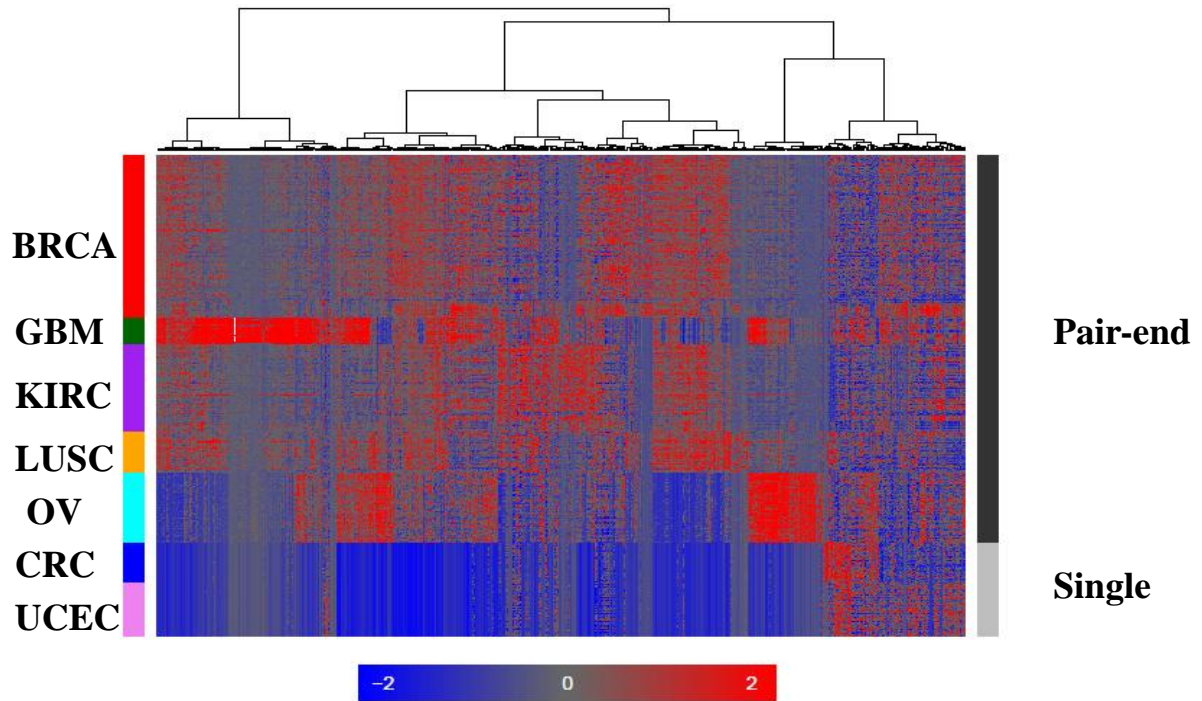

**Supplementary Figure 3. Global pattern of pseudogenes expression across different cancer types** Unsupervised clustering based on all pseudogenes surveyed. BRCA ( $n = 837$ ), KIRC ( $n = 448$ ), LUSC ( $n = 220$ ), OV ( $n = 412$ ), GBM ( $n = 154$ ), CRC ( $n = 228$ ), and UCEC ( $n = 316$ ).

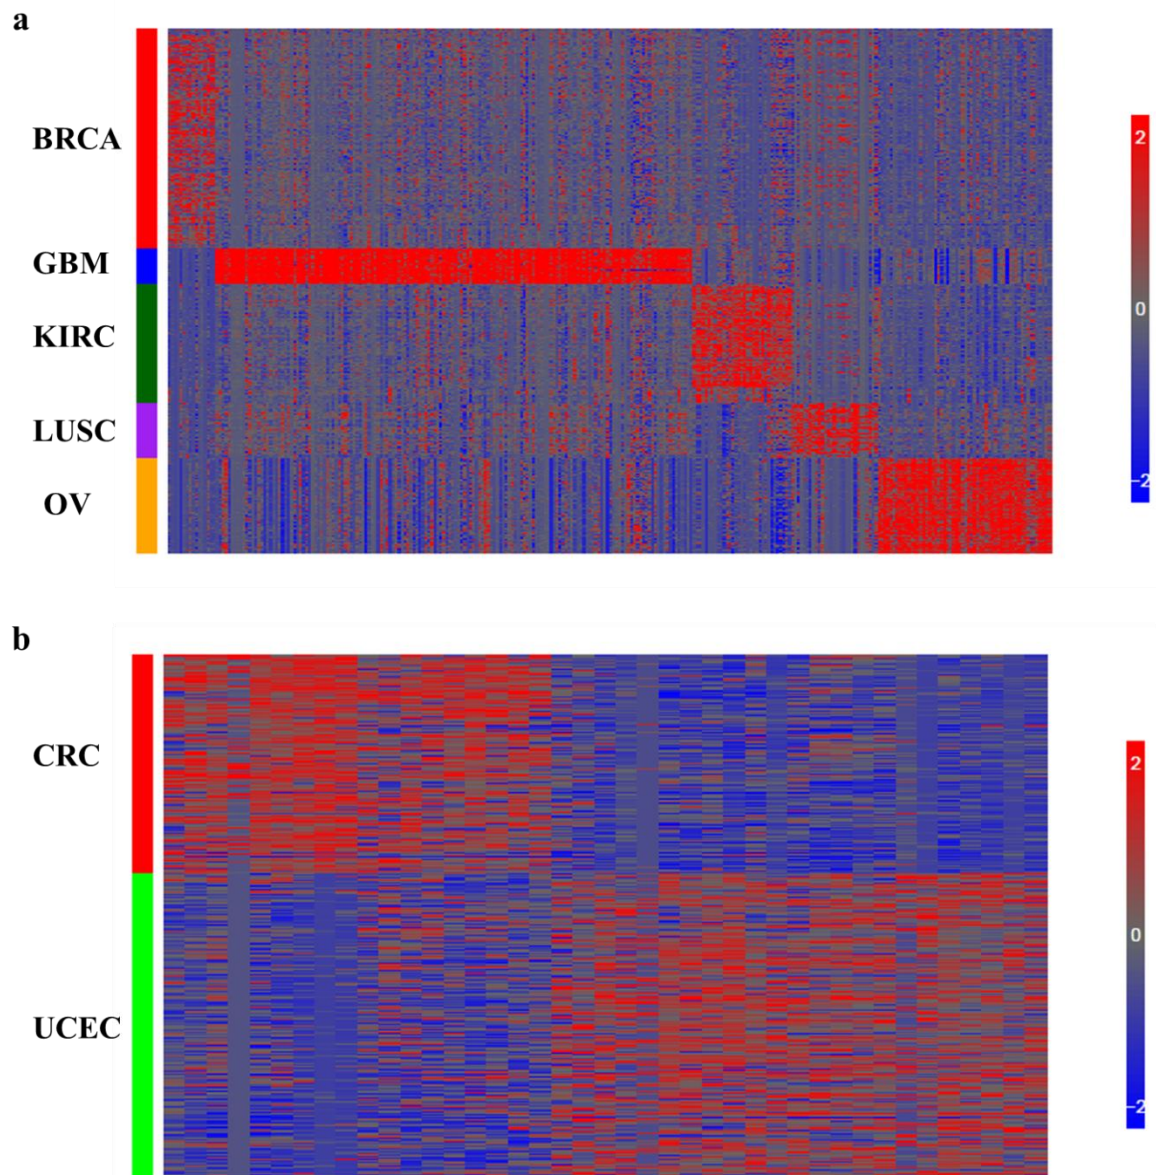

**Supplementary Figure 4. Tumor-lineage-specific pseudogenes expression across different cancer types**

(a) Pair-end sequencing for BRCA ( $n = 837$ ), KIRC ( $n = 448$ ), LUSC ( $n = 220$ ), OV ( $n = 412$ ), and GBM ( $n = 154$ ), (b) Single-end Sequencing for CRC ( $n = 228$ ) and UCEC ( $n = 316$ ). Tumor-lineage-specific pseudogenes were identified based on supervised analysis (ANOVA, corrected  $P$ -value  $< 0.05$ ,  $>1.5$  fold change). The color intensity represents the expression level (red, high; blue, low).

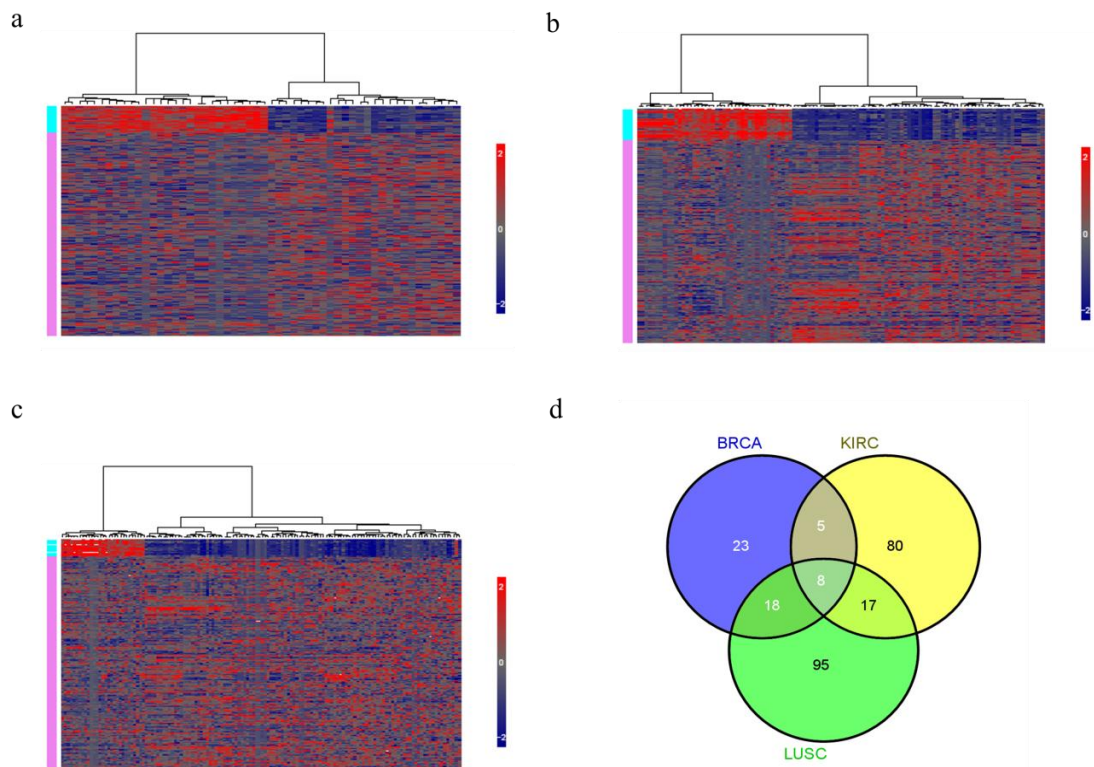

**Supplementary Figure 5. Differentially expressed pseudogenes between normal and tumor samples**

(a) BRCA (pink,  $n = 837$ ) and breast non-tumor (cyan,  $n = 105$ ) samples. (b) KIRC (pink,  $n = 448$ ) and kidney non-tumor (cyan,  $n = 67$ ). (c) LUSC (pink,  $n = 220$ ) and lung non-tumor (cyan,  $n = 17$ ) samples. (d) Overlap of cancer-related differentially expressed pseudogenes in (a)-(c). Cancer-specific pseudogenes were identified based on supervised analysis (ANOVA, corrected  $P$ -value  $< 0.05$ ,  $>1.5$  fold change). The color intensity represents the expression level (red, high; blue, low).

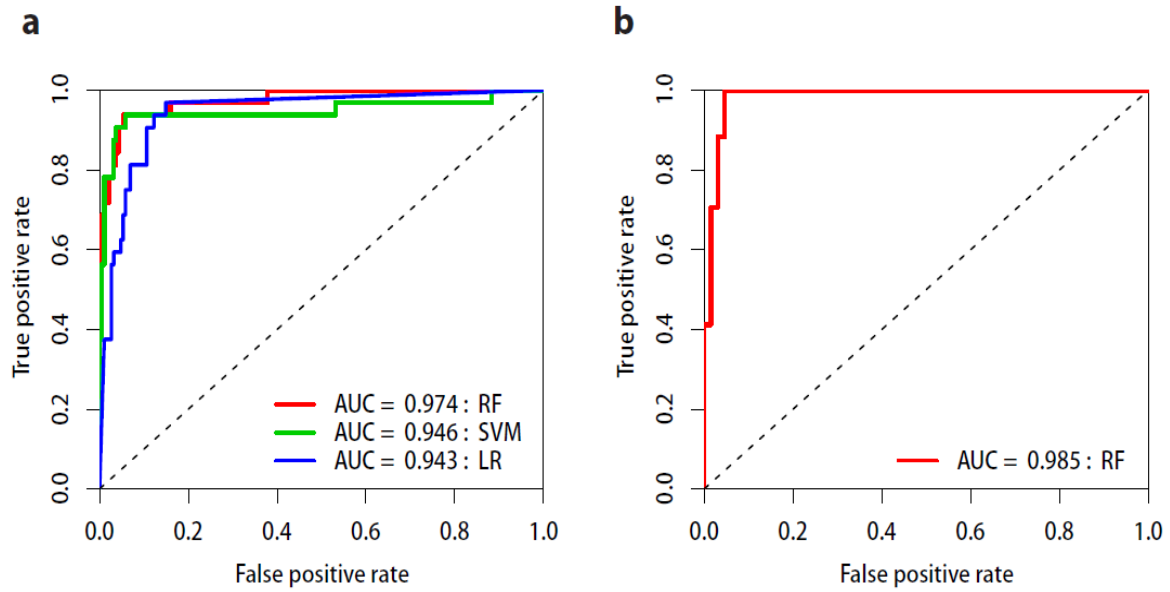

**Supplementary Figure 6. The predictive power of mRNA expression in classifying endometrial subtypes**

(a) The ROC curves of the three classifiers based on the cross-validation within the training set (RF: random forest, SVM: support vector machine, LR: logistic regression.). (b) The ROC curve by applying the best-performing classifier (RF) built from the whole training set to the test set.

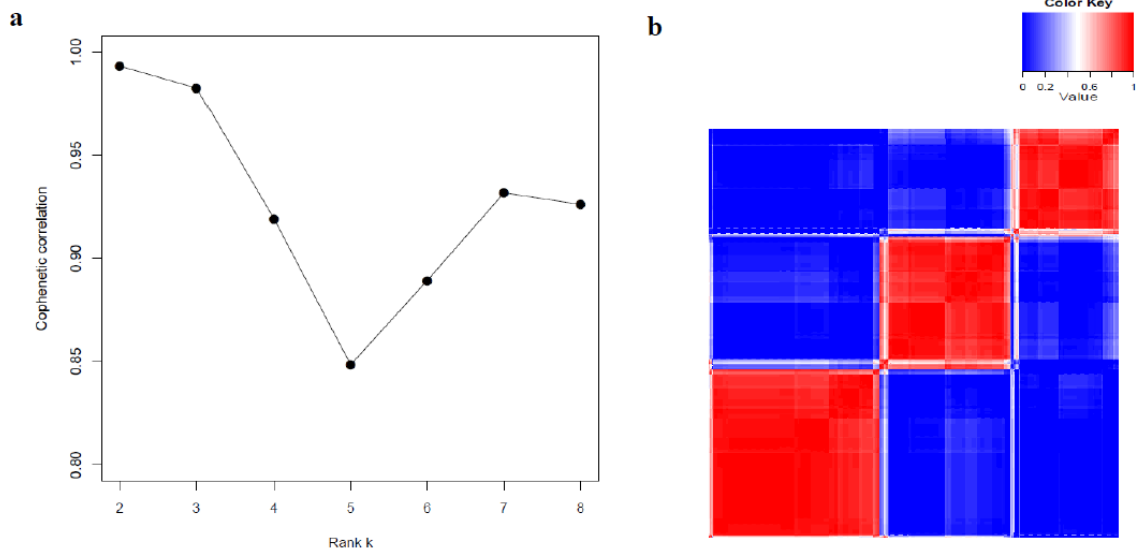

**Supplementary Figure 7. Non-negative matrix factorization (NMF) consensus cluster in breast cancer samples**

(a) Distribution of cophenetic correlation based on the number of clusters ( $K$ ) = 2 to 8, that running multiple ranks consecutively can allow for the comparison between differing numbers of clusters using cophenetic correlation. (b) Heatmap for four clusters based on NMF consensus clustering ( $n = 942$ ).

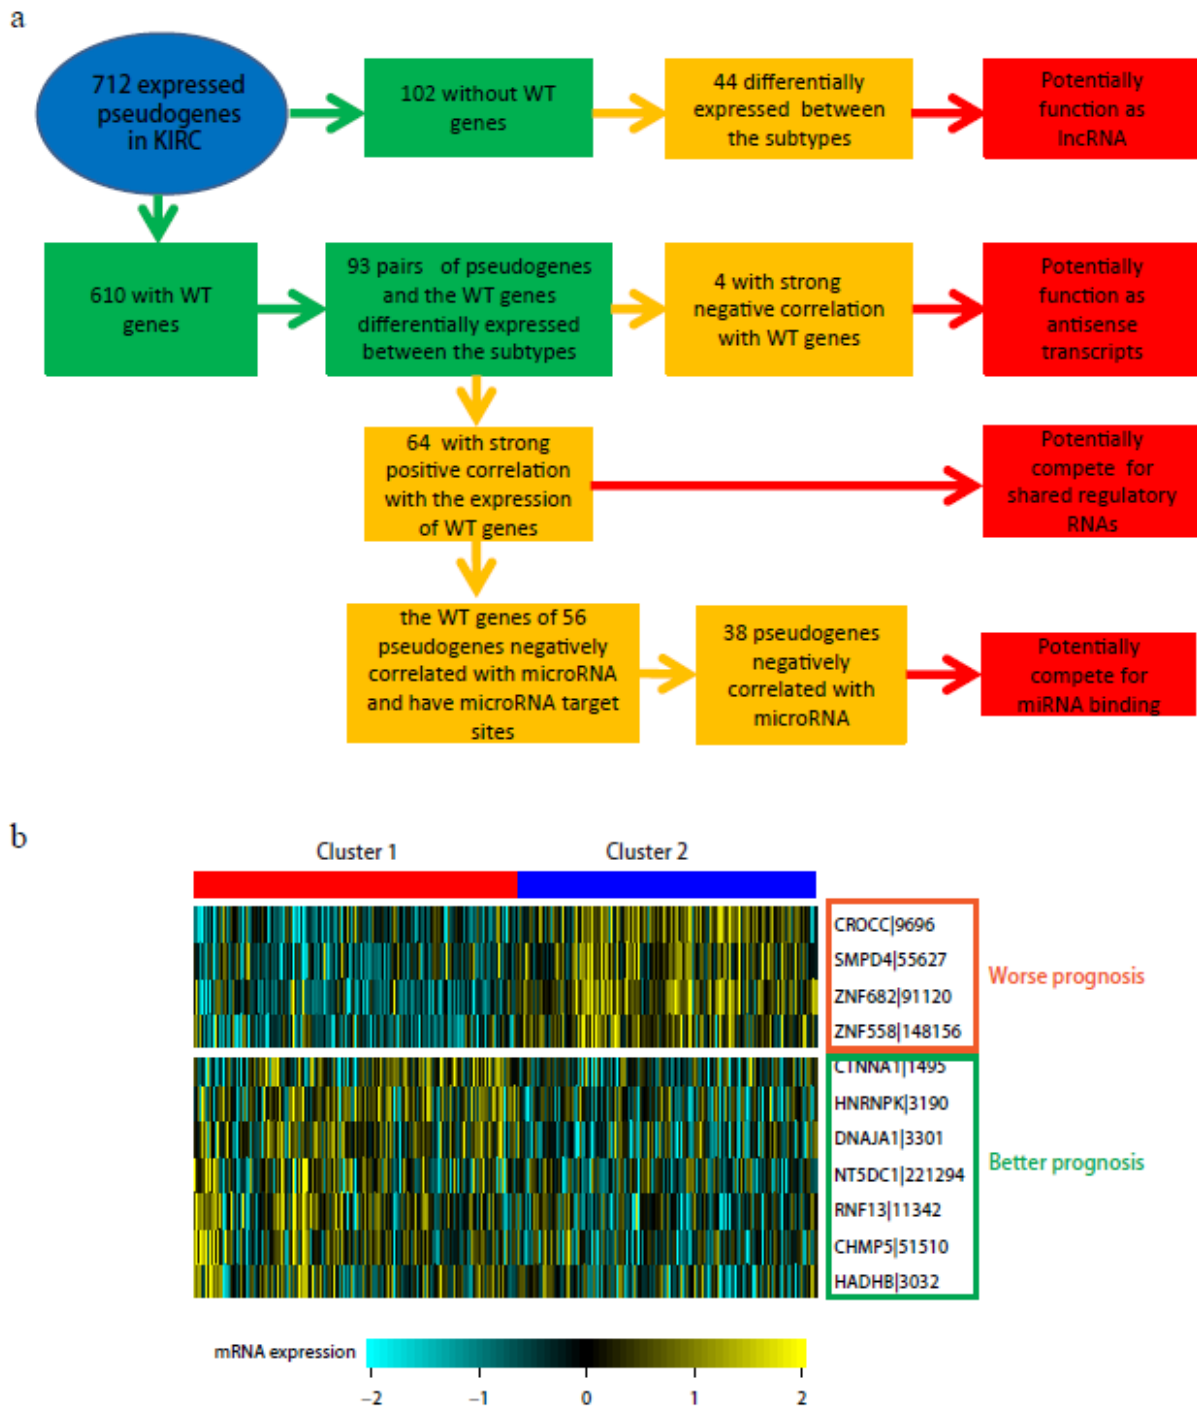

**Supplementary Figure 8. Potential functional mechanisms of expressed pseudogenes in KIRC**

(a) The analysis summary for inferring the mechanisms through which the expressed pseudogenes may function. (b) Heatmap of up-regulation of better prognosis gene and down-regulation of worse prognosis genes in the pseudogene-expression subtype (subtype 1, with a better-survival,  $n = 234$ ).
